# Supplementary material for: Large uncertainties in trends of energy demand for heating and cooling under climate change
Source: PubMed Central journal article supplement (PMC8408235; doi:10.1038/s41467-021-25504-8), 2021-08-31
Supplement: 41467_2021_25504_MOESM3_ESM.pdf [file 41467_2021_25504_MOESM3_ESM.pdf]

To view the full contents of this document, you need a later version of the PDF viewer. You can upgrade to the latest version of Adobe Reader from [www.adobe.com/products/acrobat/readstep2.html](http://www.adobe.com/products/acrobat/readstep2.html)

For further support, go to [www.adobe.com/support/products/acrreader.html](http://www.adobe.com/support/products/acrreader.html)
